# Supplementary material for: The transcription factor SOX6 contributes to the developmental origins of obesity by promoting adipogenesis
Source: Oxford University Press journal article supplement (doi:10.1242/dev.131573), 2016-01-01
Supplement: dev131573supp.pdf [file dev131573supp.pdf]

**Supplementary Table S1:** Information for all human primary ASC lines employed in the present study.

| ASC Number | Ethnicity | Gender | Phenotype |
|------------|-----------|--------|-----------|
| APOD-01    | Malay     | Male   | Obese     |
| APOD-02    | Malay     | Female | Obese     |

**Supplementary Table S2:** Information for all primary Wharton's jelly derived MSC isolates used in the present study.

| MSC Number | Phenotype | Race    | Gender | Gestational Period (weeks) | Weight (g) |
|------------|-----------|---------|--------|----------------------------|------------|
| 01         | SGA       | Chinese | Female | 39                         | 2420       |
| 23         | SGA       | Chinese | Female | 37                         | 2440       |
| 56         | SGA       | Indian  | Female | 37                         | 2265       |
| 70         | SGA       | Indian  | Female | 37                         | 2440       |
| 75         | SGA       | Indian  | Female | 37                         | 2480       |
| 82         | SGA       | Indian  | Male   | 38                         | 2835       |
| 83         | SGA       | Chinese | Male   | 39                         | 2695       |
| 84         | SGA       | Indian  | Female | 38                         | 2615       |
| 85         | SGA       | Indian  | Male   | 40                         | 2515       |
| 18         | Normal    | Chinese | Female | 40                         | 3125       |
| 44         | Normal    | Chinese | Female | 39                         | 3130       |
| 31         | Normal    | Indian  | Female | 40                         | 3070       |
| 50         | Normal    | Indian  | Female | 37                         | 2935       |
| 57         | Normal    | Indian  | Female | 39                         | 3275       |
| 60         | Normal    | Indian  | Female | 39                         | 2905       |
| 64         | Normal    | Chinese | Female | 40                         | 3830       |

**Supplementary Table S3:** List and sequence of all oligonucleotides used in the present study.

| <b>Human mRNA Expression Primers</b> |                           |                              |
|--------------------------------------|---------------------------|------------------------------|
| Gene                                 | Forward Primer            | Reverse Primer               |
| SOX6                                 | GCGTTCTGTCATCTCAGCAAAG    | TTTCGGAAGGAATATAGGGAACAT     |
| SOX5                                 | ACCTCAGGAGTTTGAAAGGATG    | ACAAGTCTCTTGCGTCAGCA         |
| SOX9                                 | GCTCTGGAGACTTCTGAACGA     | CCGTTCTTCACCGACTTCT          |
| SOX13                                | AAAGAAGTGGTGCCAGCCAT      | AGCTCCTTCTCTGCTAGGCT         |
| MEST                                 | GCAGGATGAGGGAGTGGTG       | GGGGTGAGACCTCGAGAGAA         |
| ADIPOQ                               | CTGTTGCTGGGAGCTGTTCT      | CCCTTAGGACCAATAAGACCTGG      |
| PPAR $\gamma$                        | GTGGCCGCAGAAATGACCA       | GGAGATGCAGGCTCCACTTT         |
| CEBP $\alpha$                        | TGTATACCCCTGGTGGGAGA      | TCATAACTCCGGTCCCTCTG         |
| CEBP $\beta$                         | GGCCAACCTTACTACGAGGC      | CGGATCTTGACTCGTCGCT          |
| CEBP $\delta$                        | GCCTGCGCCCTTCTACGA        | CTGCTTGAAGAATGCCGGA          |
| FABP4                                | TGGGCCAGGAATTTGACGAA      | GACGCATTCCACCACCAGTT         |
| FASN                                 | AGAGTCGGAGAACTTGCAGGA     | CTGGGTTGATGCCTCCGTC          |
| GLUT4                                | ACTGGCCATTGTTATCGGCA      | GTCAGGCGCTTCAGACTCTT         |
| GAPDH                                | GGTGTGAACCATGAGAAGTATGACA | GGTGCAGGAGGCATTGCT           |
| <b>Human ChIP Primers</b>            |                           |                              |
| Gene                                 | Forward Primer            | Reverse Primer               |
| MEST 1                               | TGAAAAGGATGGGGAGGAGG      | CAACAAGGGCCAGGTGAAAT         |
| MEST 2                               | GTGACAGTGTGTGGGAGACA      | GCGAACACAGGCATCACATA         |
| MEST 3                               | GTGTGGGAAAGAGGAGGTGA      | CGAGCCTTCCGTATTTACAGC        |
| PPAR $\gamma$ 1                      | GCACCACCGATCAGAAGAGA      | GCCGTCTTCCCAAGATGTTCT        |
| PPAR $\gamma$ 2                      | TCCCTCGGTGTCAGAAACAC      | GCTGCACACTTTCAGAGTTC         |
| PPAR $\gamma$ 3                      | AGACCAGCGCTTCTGAAC        | TTCTTTTCCTGCCACGCTGT         |
| SOX4 (Control)                       | CATGGTGCAGCAAACCAACA      | TTCATGGGTCGCTTGATGTG         |
| <b>Pyrosequencing Primers</b>        |                           |                              |
| Gene                                 | Forward Primer            | Reverse Primer               |
| MEST CpGs A-D                        | TAAAGGGTATGAAATGGTAGGT    | ATCACTTCTTTAACCTTCACTTTTATTA |
| MEST CpGs E-F                        | GGTTTTATTTTGTTTTAGGGAGGAT | ACCTACCATTTTCATACCCCTTAC     |
| <b>Sequencing Primers</b>            |                           |                              |
| MEST CpGs A-D sequencing             | ATATAAAAATACTCAAATCAAAC   |                              |
| MEST CpGs E-F sequencing             | GTTTTAGAGTTTAGTATGTGTTG   |                              |
| <b>Mouse mRNA Expression Primers</b> |                           |                              |
| Gene                                 | Forward Primer            | Reverse Primer               |
| SOX6                                 | TTGGGGAGTACAAGCAACTGATGC  | ATCTGAGGTGATGGTGTGGTCGTT     |
| SOX5                                 | TCTCTGCTGACGCAAGAGAC      | GTGTCCACCACATCCGCTAA         |
| SOX9                                 | CGAGCACTCTGGCAATCTCA      | CAATGTTGGAGATGACGTGCG        |
| SOX13                                | GGACTGCGGAAGGGAACAC       | GGACATCTAATCGGTCCGGC         |
| MEST                                 | GGCCATTGGATCTATAAAATCCGTA | GGTAGTGGCTAATGTGGTATCCAG     |
| ADIPOQ                               | TGACGACACCAAAAAGGGCTC     | AGAGTCCCGGAATGTTGCAG         |
| PPAR $\gamma$                        | CATGACCAGGGAGTTCCTCAA     | AGCAAACCTCAAACCTTAGGCTCCAT   |
| CEBP $\alpha$                        | CCAAGAAGTCGGTGGACAAGA     | CGGTCACTGTCACTGGTCAAC        |
| CEBP $\beta$                         | AGCGGCTGCAGAAGAAGGT       | GGCAGCTGCTTGAACAAGTTC        |
| CEBP $\delta$                        | CGACTTCAGCGCTACATTGA      | CTAGCGACAGACCCACAC           |
| FABP4                                | GATGAAATCACCGCAGACG       | GCCTTTTCATAAACTCTGTGG        |
| GLUT4                                | GTGACTGGAACACTGGTCTCA     | CCAGCCACGTTGCATTGTAG         |
| LDLR                                 | CCACTTCCGTCGCAACTCA       | CGTCGCAGGCCAAAG              |
| FASN                                 | AGATGGAAGGCTGGGCTCTA      | GAAGCGTCTCGGGATCTCTG         |
| FABP5                                | CATGGCCAAGCCAGACTGTA      | GGTGCAGACCGTCTCAGTTT         |
| IMMP2L                               | TTGGACCGTTTCTCTGGGA       | GGAGGCATCTGGTGTGTTCA         |
| ACACB                                | ACCTGCAGAACGAAGGTGAG      | GACTCCTCGATCTGAGCGG          |
| NFAT5                                | GTAGTTGCTGCTGATGCTTCTT    | TCTTCGGGGTTGATGGATGC         |
| PMVK                                 | TCGATGTGGGCTGTGTAGTG      | CTCCAAGTCTGCTTCTCAGCC        |
| ACSS2                                | GCATTCAGAAGGGTGACCGA      | AGCAGATCTGGACATCTGGAC        |
| DAPK1                                | AGCACGGGCGAGATAAACAT      | TCCCACTACTCAGGTCTCGG         |
| UBE2E2                               | GCCGCGAGGATCTAAGATGT      | CAGCACTACAGTTGGGAGGG         |
| MKNK2                                | CGTGGCGGATCCATCCTAAG      | CTGGCTTAGGTCCCTGTGG          |
| YAF2                                 | TGTGGTCCCCTGACAGTTGTG     | TGAAGAATGAGGTATCTGAGCGT      |
| UPP2                                 | GACTTGAAGCTGCATCATTTGTA   | ATGGAAGCCATACTCTGCGG         |
| PP1A                                 | CATACAGGTCCTGGCATCTTGTG   | AGACCACATGCTTGCATCCAG        |
| <b>Mouse ChIP Primers</b>            |                           |                              |
| Gene                                 | Forward Primer            | Reverse Primer               |
| MEST 1                               | AGAATCCTTCAAGCCATTGAT     | CCCACCTTACTTCCCGTAA          |
| MEST 2                               | TCCCTAGCCATTTAGTGTGCC     | AAAATTCGGGTCACCAATGCG        |
| MEST 3                               | TCCCTAGCCATTTAGTGTGCC     | CCTACGTGTGTTTTGAGCC          |
| PPAR $\gamma$ 1                      | GTGGGTGAAATTCATGTTTGTGTTT | GGAAGCCATGAGCAGAGATAAAAT     |

|                                             |                        |                       |
|---------------------------------------------|------------------------|-----------------------|
| PPAR $\gamma$ 2                             | AGAATTCTGTCTTCTTCAGGCA | TGTCCTGACTCTAGAACTTGC |
| SOX4 (Control)                              | CCCCACTGCAGACTCTCTA    | GCTGATTGGCTGTCTGAGAA  |
| <b>Mouse LNA Antisense Oligonucleotides</b> |                        |                       |
| <b>Product Name</b>                         | <b>Sequence 5'-3-</b>  |                       |
| Negative Control                            | AACACGTCTATACGC        |                       |
| SOX6                                        | TCTAGGTGGATTTC         |                       |

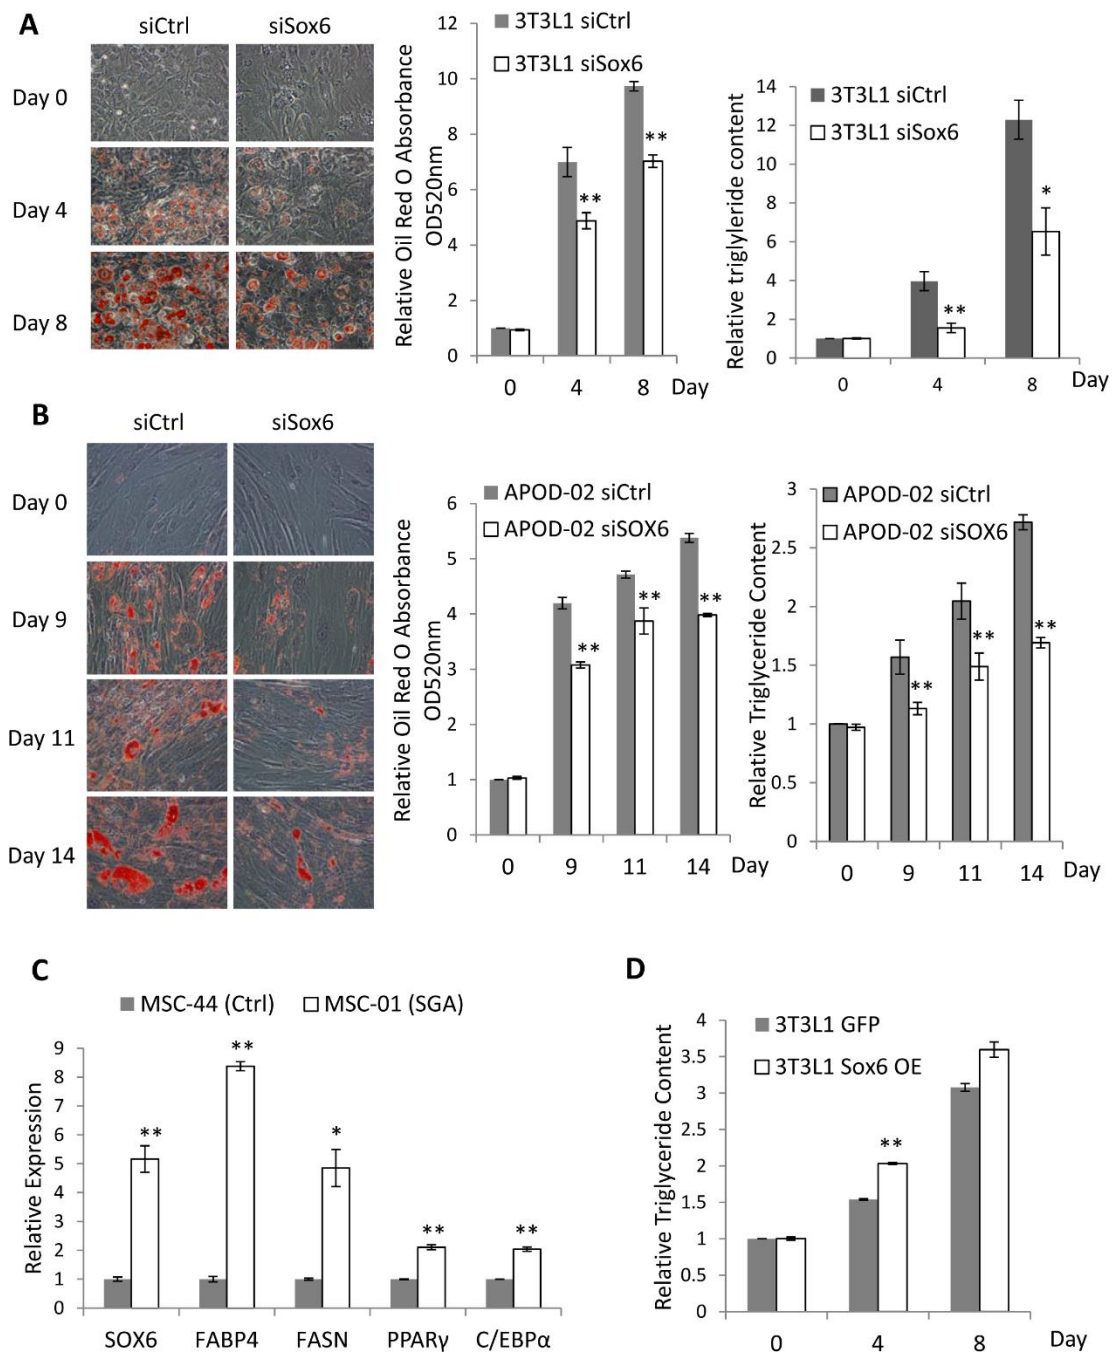

**Supplementary Figure S1:** SOX6 down-regulation inhibits adipocyte differentiation in both mouse and human pre-adipocytes. (A, B) Oil Red O staining (left) of siCtrl-treated or siSOX6-treated 3T3L1 and APOD-02 cells at different stages of differentiation. Images are representatives of three independent experiments. Middle panels depict the quantification of Oil Red O absorption by spectrophotometry. Data represent the mean relative absorbance  $\pm$  SEM compared with siCtrl day 0

(n=3; \*=p<0.05, \*\*p<0.01). Right panels depict the amount of total triglycerides in siCtrl-treated or siSOX6-treated 3T3L1 or APOD-02 cells. Measurements were performed in triplicates and normalized against their total protein content in three separate experiments. Data are shown as mean  $\pm$  SEM, relative to siCtrl day 0. A two-way ANOVA was performed to show significant difference in time points ( $p < 0.0001$ ) and between siRNA treatment ( $p < 0.0001$ ) over triglyceride content followed by a Student t-test (\*=p<0.05, \*\*p<0.01). (C) mRNA expression of SOX6 and adipogenic genes including FABP4, FASN, PPAR $\gamma$  and C/EBP $\alpha$  were determined by RT-qPCR in MSC-01 and MSC-44 at cycle 6 of adipocyte differentiation. Data are shown as mean fold change  $\pm$  SEM relative to that of MSC-44 samples. p-values were calculated by Student t-test's analysis (\*= p<0.05 and \*\*=p< 0.01). (D) Ectopic over-expression of Sox6 in 3T3L1 (labelled as "3T3L1 Sox6 OE") increases triglyceride levels at mid stages of adipocyte differentiation. Data from 2 independent experiments are shown as mean  $\pm$  SEM. A two-way ANOVA was performed to show significant difference in time points ( $p < 0.0001$ ) and between siRNA treatment over triglyceride content followed by a Student t-test (\*\*p<0.01).

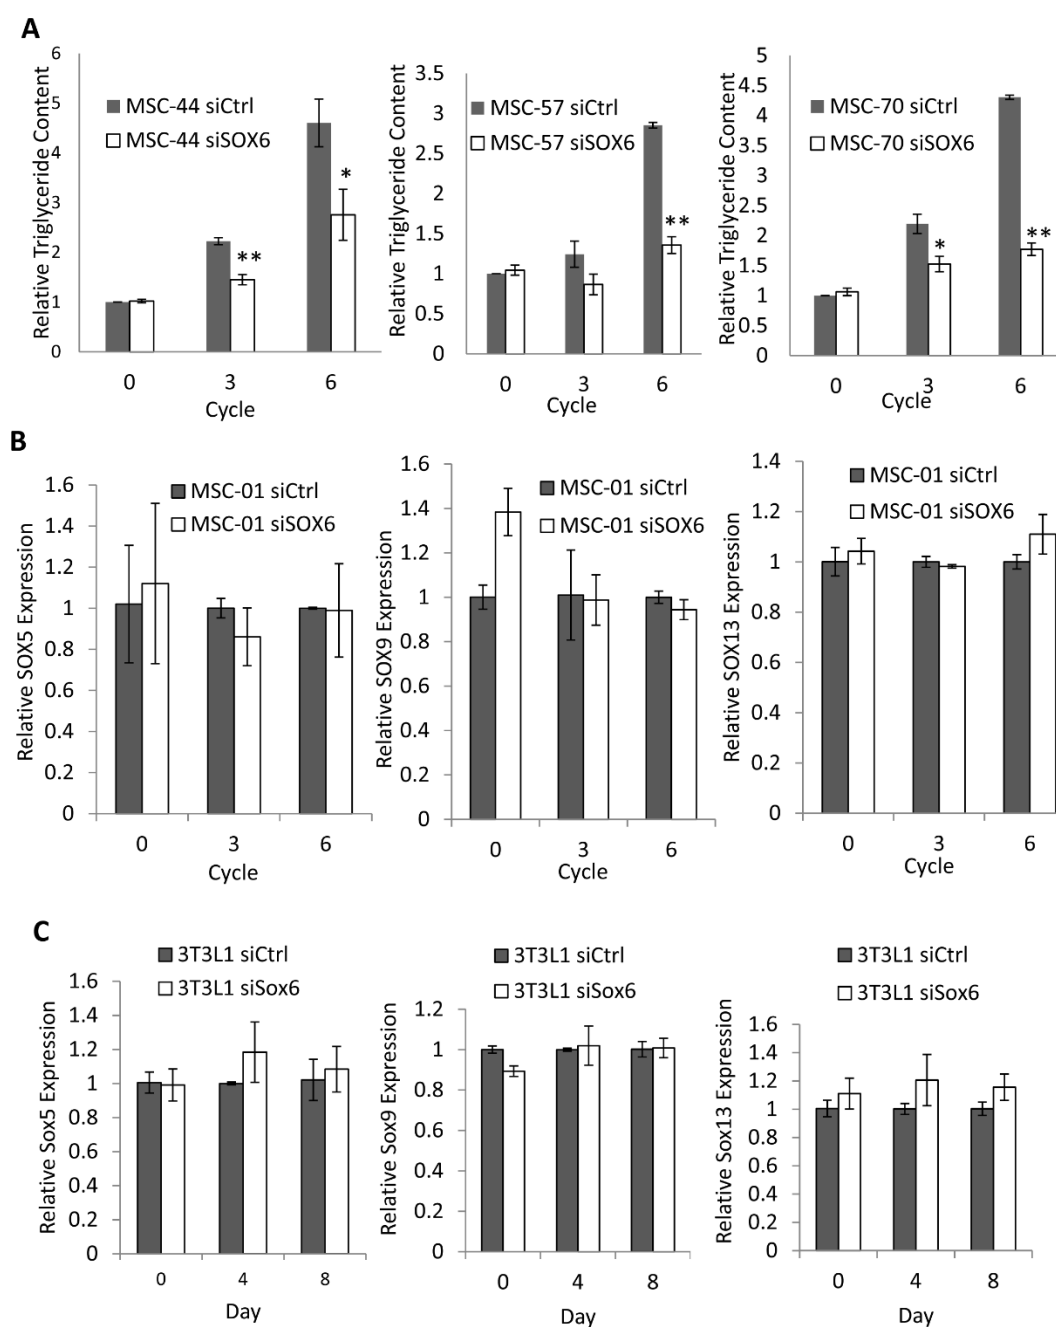

**Supplementary Figure S2.** SOX6 deficiency reduces total lipid accumulation in additional primary MSC lines and does not affect expression of other members of the SOX family. (A) The amount of total triglycerides in MSC-44, MSC-57 and MSC-70 after downregulation of SOX6 by siRNA treatment was measured in triplicates and normalized against the respective total protein content in three separate experiments. Data are shown as mean  $\pm$  SEM, relative to siCtrl Cycle 0. A two-way ANOVA was performed to show significant difference in time points ( $p < 0.0001$ ) points and between

siRNA treatment ( $p=0.0028$  for MSC-44 and  $p < 0.0001$  for MSC-57 and MSC-70) over triglyceride content followed by a Student t-test ( $*=p < 0.05$ ,  $**p < 0.01$ ). (B, C) mRNA expression of SOX5, SOX9 and SOX13 following siSOX6 treatment in MSC-01 and 3T3L1 cells. Data are shown as mean  $\pm$  SEM for SOX6 expression relative to control siRNA at each individual time point. p-values were calculated by Student t-test's analysis.

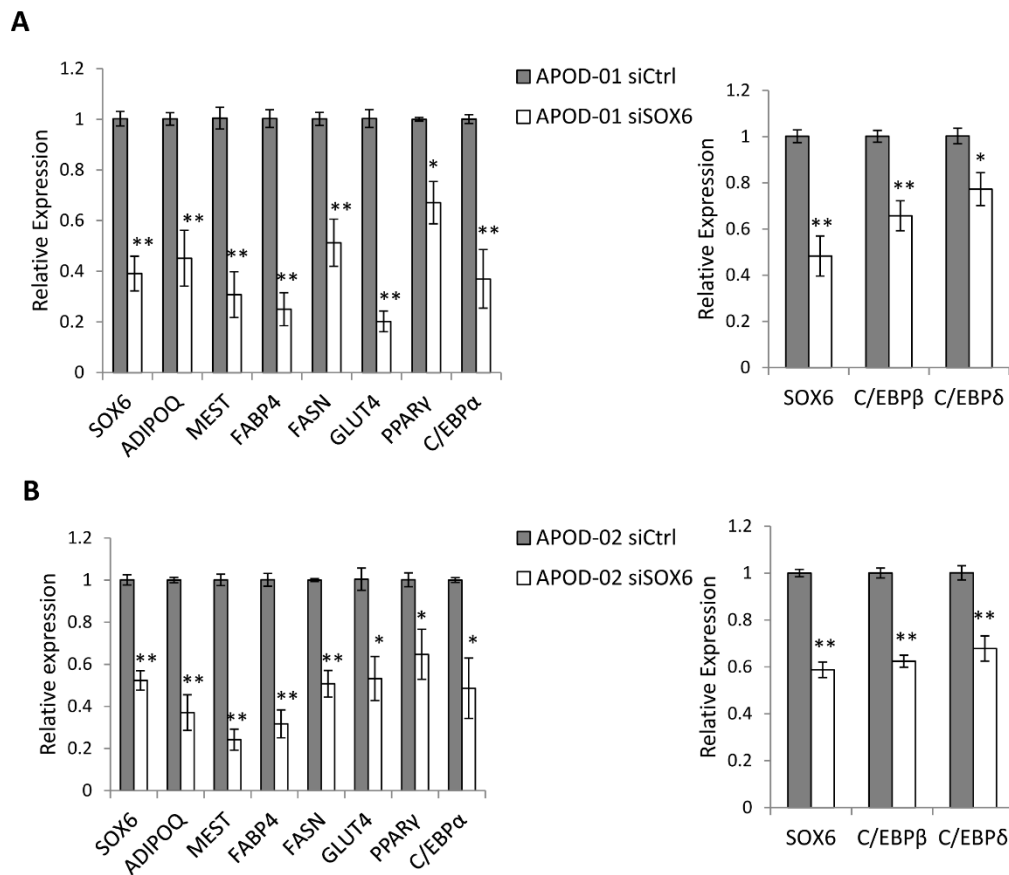

**Supplementary Figure S3: SOX6 controls adipogenesis by regulating the expression of key adipogenic genes in human pre-adipocyte cells.** (A, B) mRNA expression levels of adipocyte markers, ADIPOQ, MEST, FABP4, FASN, GLUT4 and two master adipogenic regulators, PPAR $\gamma$  and C/EBP $\alpha$ , were determined by qPCR in APOD-01 and APOD-02 siSOX6 treated cells in comparison with the control group (siCtrl). Data are shown as mean  $\pm$  SEM of at least 3 independent experiments. p-values were calculated by Student t-test's analysis (\*= p<0.05 and \*\*=p< 0.01). Right panels show the mRNA expression levels of adipogenic initiation regulators, C/EBP $\beta$  and C/EBP $\delta$  which were determined by qPCR in siSOX6 cells in comparison with control cells (siCtrl) at day 0. Data are shown as mean  $\pm$  SEM. of at least 3 independent experiments. p-values were calculated by Student t-test's analysis (\*= p<0.05 and \*\*=p< 0.01).



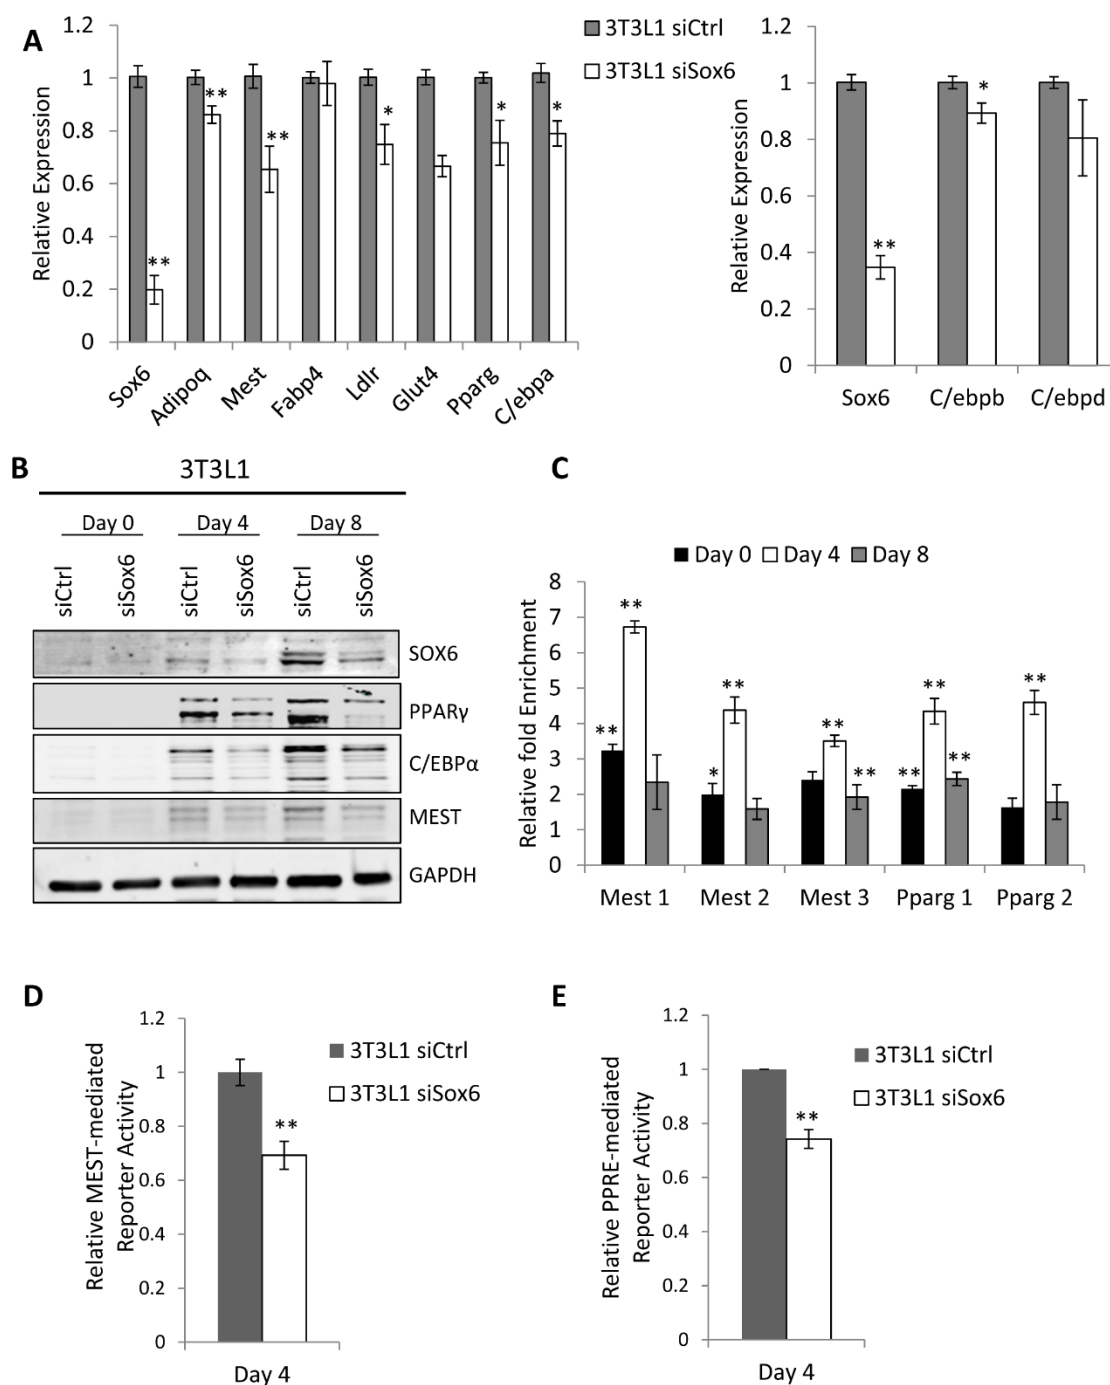

**Supplementary Figure S4:** SOX6 controls adipogenesis by binding to promoters of *Mest* and *Pparg* and by regulating the expression of key mediators of adipogenesis in mouse 3T3L1 cells. (A) mRNA expression levels of adipocyte markers, *Adipoq*, *Mest*, *Fabp4*, *Fasn*, *Glut4* and two master adipogenic regulators, *Pparg* and *C/ebpa*, were determined by qPCR in siSox6 treated 3T3L1 cells in comparison with the control group (siCtrl). Data are shown as mean  $\pm$  SEM of at least 3 independent experiments.

p-values were calculated by Student t-test's analysis (\*=  $p < 0.05$  and \*\*= $p < 0.01$ ). Right panels show the mRNA expression levels of adipogenic initiation regulators, C/ebp $\beta$  and C/ebp $\delta$  which were determined by qPCR in siSox6 cells in comparison with control cells (siCtrl) at day 0. Data are shown as mean  $\pm$  SEM. of at least 3 independent experiments. p-values were calculated by Student t-test's analysis (\*=  $p < 0.05$  and \*\*= $p < 0.01$ ). (B) Protein expression of Sox6 and adipogenic markers in siCtrl- and siSox6-treated 3T3L1 cells. (C) SOX6 enrichment at the mouse Mest and Pparg promoters was measured by ChIP-qPCR at day 0, 4 and 8 of the adipocyte differentiation process in 3T3L1 cells. Data are shown as mean fold enrichment  $\pm$  SEM of three independent experiments and were normalized against IgG enrichment and against a negative control site (SOX4). p-values were calculated by Student t-test's analysis (\*\*= $p < 0.01$ ). (D and E) siRNA-mediated inhibition of Sox6 decreased luciferase expression from a Mest (D) and Pparg (E) target gene reporter construct in 3T3L1 cells at day 4 of adipocyte differentiation. Luciferase experiments were performed in triplicates on four independent occasions. Data are shown as relative mean + SEM and compared against siCtrl cells at each respective day. p-values were calculated by Student t-test's analysis (\*= $p < 0.05$ , \*\*= $p < 0.01$ ).

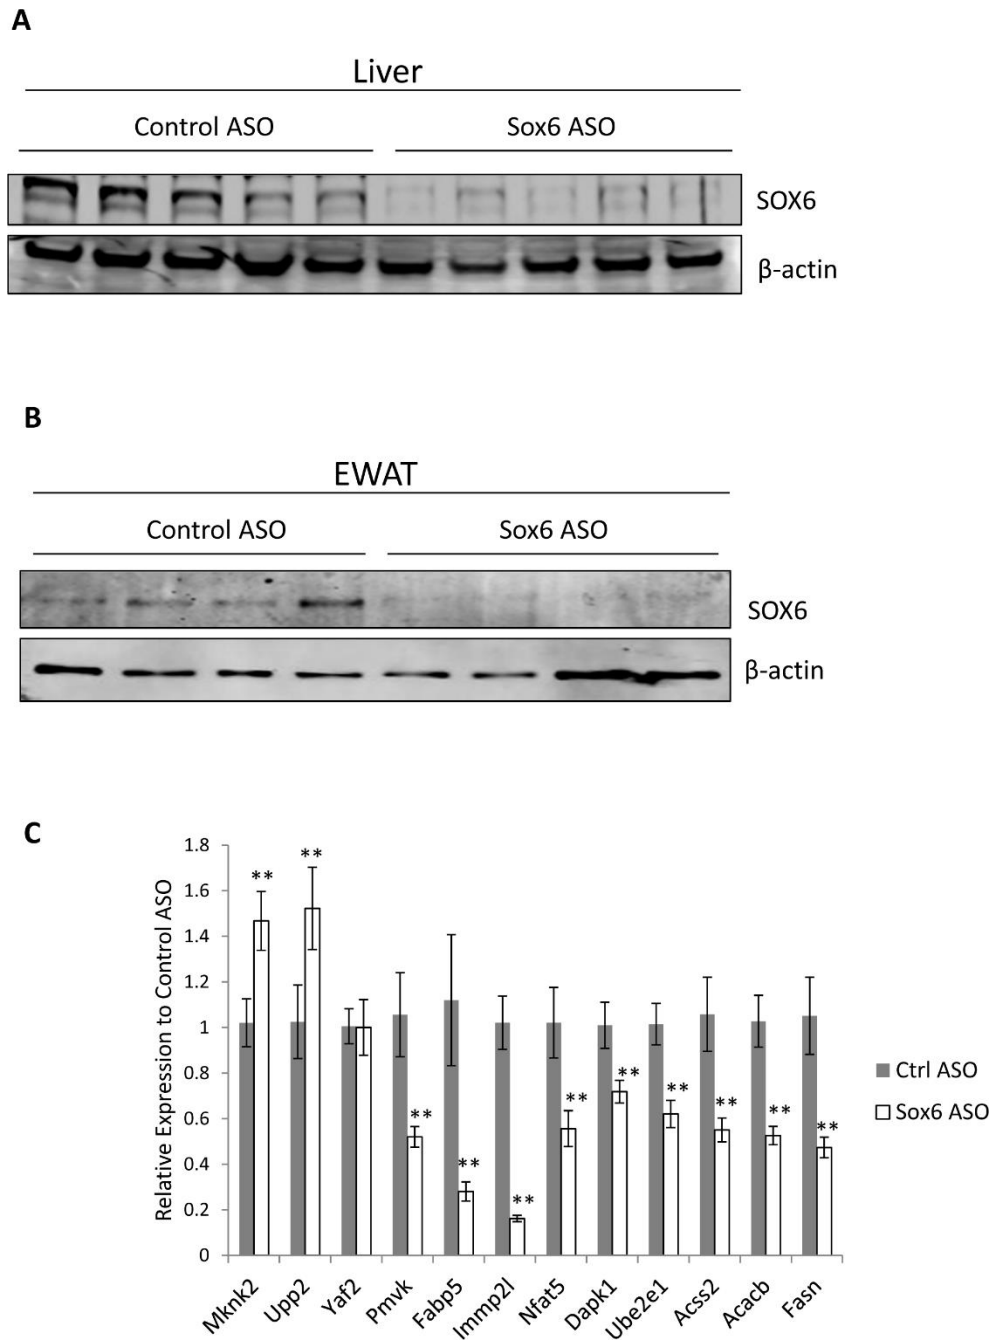

**Supplementary Figure S5:** Differential gene expression in liver tissues from mice treated with Sox6 and control ASOs. Protein expression of SOX6 in the (A) liver tissues (n=5) and (B) epididymal white adipose tissues (EWAT; n=4) of control and Sox6 ASO-treated mice. (C) Differential gene expression in livers from mice treated with Sox6 ASOs (n=4) compared to the control group (n=4). mRNA expression of selected candidate genes from a gene expression microarray experiment as assessed by qRT-PCR. p-values were calculated by Student t-test's analysis (\*\*=p< 0.01).
